# Supplementary material
Source: MDPI journal article supplement (https://www.mdpi.com/2073-4395/12/4/823)
Supplement: s1 [file s1]

## Article

# Arable weeds at the edges of kettle holes as overwintering habitat for phytopathogenic fungi

Marina Gerling <sup>1,2\*</sup>, Marlene Pätzig <sup>1</sup>, Lina Hempel <sup>2</sup>, Carmen Büttner <sup>2</sup> and Marina E. H. Müller <sup>1</sup>

<sup>1</sup> Leibniz Centre for Agricultural Landscape Research (ZALF), 15374 Müncheberg, Germany; marlene.paetzig@zalf.de (M.P.); mmueller@zalf.de (M.E.H.M.)

<sup>2</sup> Albrecht Daniel Thaer-Institute, Faculty of Life Science, Humboldt-Universität zu Berlin, 14195 Berlin, Germany; hempelli@hu-berlin.de (L.H.); carmen.buettner@agrar.hu-berlin.de (C.B.)

\* Correspondence: marina.gerling@zalf.de or marina.gerling@web.de; +4915203678348

## Supplementary Materials

**Table S1.** Primers used for the identification of *Fusarium* and *Alternaria*.

|            |         |                                       |
|------------|---------|---------------------------------------|
| S SUF pl3  | probe   | 5'-AACCCCTTACCGAGCTCAGCGGCTTCCTATT-3' |
| Fa PL3 f   | forward | 5'-TACCCCGCCACTCGAGCG-3'              |
| Fus pl rev | reverse | 5'-TTGAGCTTGTCAAGAACCCAGGCG-3'        |
| Alt-Prt    | probe   | 5'-TGGGTTCGCCCACCACTAGGACA-3'         |
| Alt-F      | forward | 5'-TCTTTTGCCTACTTCTTGTTCCTT-3'        |
| Alt-R      | reverse | 5'-TACTGACGCTGATTGCAATTACA-3'         |
